# Supplementary material
Source: publisher figshare collection journal article supplement (https://acs.figshare.com/ndownloader/files/4718779)

# The Importance of Correlated Motions on the Low Barrier Rotational Potentials of Crystalline Molecular Gyroscopes

Peter D. Jarowski, Kendall N. Houk, and Miguel A. Garcia-Garibay\*

Department of Chemistry and Biochemistry University of California, Los Angeles,

California 90095-1569

mgg@chem.ucla.edu and houk@chem.ucla.edu

## SUPPORTING INFORMATION

### SI 1. Raw rotational energy profile data for **M-1A** and **M-1B** using *constraint sets I - IV*.

| Dihedral<br>Angle (deg) | Energy (kcal/mol)                  |                      |                       |                      |                     |                                     |                       |                      |
|-------------------------|------------------------------------|----------------------|-----------------------|----------------------|---------------------|-------------------------------------|-----------------------|----------------------|
|                         | <b>M-1A</b><br>Constraint<br>Set I | Constraint<br>Set II | Constraint<br>Set III | Constraint<br>Set IV | Constraint<br>Set I | <b>M-1B</b><br>Constraint<br>Set II | Constraint<br>Set III | Constraint<br>Set IV |
| 0                       | 3406.00                            | 2910.06              | 2865.24               | 1087.76              | 3368.26             | 2903.50                             | 2843.13               | 2891.95              |
| 10                      | 3407.12                            | 2910.60              | 2865.80               | 1087.88              | 3369.19             | 2904.27                             | 2843.91               | 2892.61              |
| 20                      | 3409.56                            | 2911.95              | 2867.16               | 1088.49              | 3371.55             | 2906.26                             | 2845.75               | 2894.19              |
| 30                      | 3413.23                            | 2914.08              | 2869.22               | 1087.58              | 3375.25             | 2909.38                             | 2848.54               | 2896.66              |
| 40                      | 3417.91                            | 2916.74              | 2869.04               | 1087.92              | 3380.22             | 2913.53                             | 2852.07               | 2899.79              |
| 50                      | 3423.44                            | 2917.32              | 2869.77               | 1088.52              | 3386.57             | 2918.43                             | 2855.75               | 2903.15              |
| 60                      | 3430.26                            | 2919.30              | 2870.74               | 1089.46              | 3394.49             | 2923.10                             | 2858.63               | 2905.66              |
| 70                      | 3438.80                            | 2921.72              | 2872.16               | 1091.03              | 3404.09             | 2926.69                             | 2860.27               | 2907.28              |
| 80                      | 3449.26                            | 2924.68              | 2874.06               | 1093.21              | 3415.34             | 2927.90                             | 2860.63               | 2908.07              |
| 90                      | 3461.72                            | 2928.16              | 2876.30               | 1095.65              | 3428.05             | 2926.94                             | 2860.51               | 2907.99              |
| 100                     | 3476.12                            | 2931.84              | 2878.63               | 1098.09              | 3438.82             | 2924.38                             | 2859.80               | 2906.77              |
| 110                     | 3489.38                            | 2934.87              | 2880.66               | 1099.70              | 3398.11             | 2921.39                             | 2857.81               | 2905.12              |
| 120                     | 3426.46                            | 2919.98              | 2882.19               | 1100.35              | 3391.73             | 2918.34                             | 2855.16               | 2903.04              |
| 130                     | 3419.70                            | 2917.57              | 2871.67               | 1092.18              | 3385.52             | 2915.11                             | 2852.38               | 2900.61              |
| 140                     | 3414.31                            | 2915.26              | 2869.39               | 1090.83              | 3379.41             | 2911.57                             | 2849.51               | 2897.97              |
| 150                     | 3410.27                            | 2913.10              | 2867.37               | 1089.15              | 3374.38             | 2908.16                             | 2846.78               | 2895.41              |
| 160                     | 3407.56                            | 2911.39              | 2865.81               | 1087.61              | 3370.79             | 2905.47                             | 2844.63               | 2893.38              |
| 170                     | 3406.16                            | 2910.33              | 2864.91               | 1086.77              | 3368.76             | 2903.87                             | 2843.38               | 2892.20              |
| 180                     | 3406.02                            | 2910.06              | 2864.72               | 1086.70              | 3368.28             | 2903.50                             | 2843.15               | 2891.97              |
| 190                     | 3407.17                            | 2910.62              | 2865.35               | 1087.13              | 3369.35             | 2904.42                             | 2844.05               | 2892.77              |
| 200                     | 3409.55                            | 2911.98              | 2866.72               | 1087.46              | 3371.93             | 2906.65                             | 2846.12               | 2894.59              |
| 210                     | 3413.07                            | 2914.08              | 2868.72               | 1087.60              | 3375.95             | 2910.10                             | 2849.18               | 2897.34              |
| 220                     | 3417.52                            | 2916.71              | 2869.01               | 1087.98              | 3381.35             | 2914.59                             | 2852.89               | 2900.67              |
| 230                     | 3422.75                            | 2917.26              | 2869.69               | 1088.60              | 3388.20             | 2919.44                             | 2856.31               | 2903.74              |
| 240                     | 3429.08                            | 2919.23              | 2870.66               | 1089.64              | 3396.50             | 2923.59                             | 2858.82               | 2905.87              |
| 250                     | 3436.89                            | 2921.63              | 2872.08               | 1091.37              | 3406.12             | 2926.74                             | 2860.27               | 2907.31              |
| 260                     | 3446.31                            | 2924.58              | 2873.97               | 1093.69              | 3416.79             | 2927.89                             | 2860.62               | 2908.06              |
| 270                     | 3457.29                            | 2928.03              | 2876.22               | 1096.13              | 3427.75             | 2927.05                             | 2860.53               | 2908.06              |
| 280                     | 3469.70                            | 2931.66              | 2878.56               | 1098.31              | 3436.23             | 2924.33                             | 2859.88               | 2906.90              |
| 290                     | 3483.25                            | 2934.74              | 2880.62               | 1099.75              | 3396.72             | 2921.18                             | 2857.72               | 2905.16              |
| 300                     | 3426.52                            | 2935.88              | 2882.17               | 1100.36              | 3390.77             | 2918.08                             | 2854.98               | 2902.93              |
| 310                     | 3419.99                            | 2917.74              | 2871.85               | 1092.16              | 3384.97             | 2914.85                             | 2852.21               | 2900.44              |
| 320                     | 3414.67                            | 2915.44              | 2869.59               | 1090.79              | 3379.29             | 2911.43                             | 2849.41               | 2897.89              |
| 330                     | 3410.57                            | 2913.27              | 2867.55               | 1089.11              | 3374.48             | 2908.17                             | 2846.78               | 2895.43              |
| 340                     | 3407.74                            | 2911.51              | 2865.92               | 1087.64              | 3370.93             | 2905.55                             | 2844.69               | 2893.46              |
| 350                     | 3406.21                            | 2910.38              | 2864.95               | 1086.81              | 3368.84             | 2903.92                             | 2843.41               | 2892.26              |
| 360                     | 3406.00                            | 2910.06              | 2864.70               | 1086.67              | 3368.26             | 2903.49                             | 2843.12               | 2891.94              |

### SI 2. Potential Energy Profiles and Energetic Breakdown.

The type and magnitude of the forces acting on a rotator are analyzable from the molecular mechanics calculation. The energy profiles of **M-1A** and **M-1B** using *constraint set IV* are decomposed into their

constituent mechanical ( $E_m$ ) (stretch, bend, and torsion), van der Waals or steric ( $E_{vdW}$ ), and electrostatic ( $E_e$ ) energies. The results are shown below.

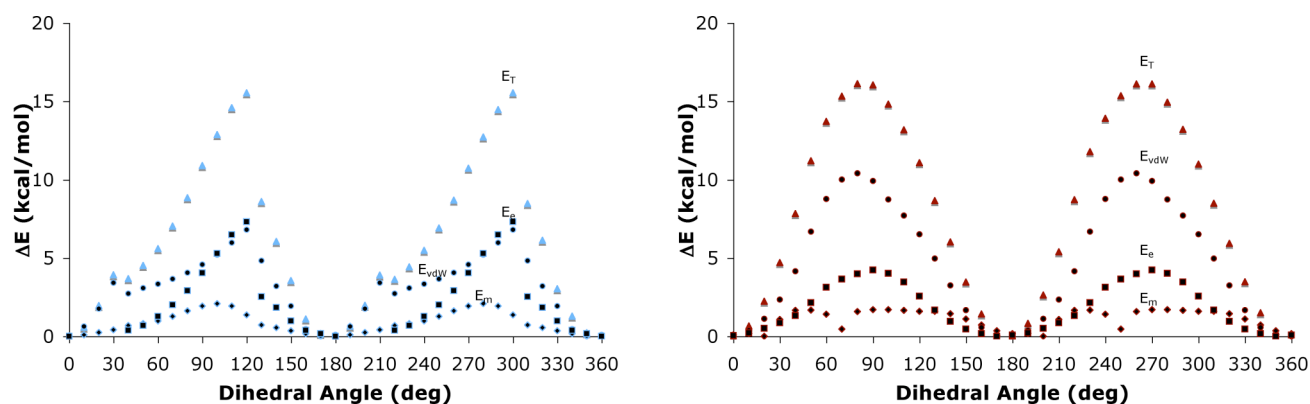

**Caption:** Rotational potential energy profiles (triangles) and energetic breakdown into the van der Waals ( $E_{vdW}$ ) (circles), electrostatic ( $E_e$ ) (squares), and mechanical (sum of the stretch, bend, and torsion strain terms) ( $E_m$ ) (diamonds) for the clathrate **M-1A** (left) and desolvated **M-1B** (right) rotors using *constraint set IV*.

The  $E_{vdW}$  and  $E_e$  contributions to the rotational energy profile for **M-1A** are close in magnitude, and they are both far greater than  $E_m$ . It should be noted that the electrostatic contribution in aromatic systems arise from the quadrupolar nature of their structures, with electrostatic potentials that vary from positive in the center of the ring, to negative on the edges. The  $E_{vdW}$  and  $E_e$  terms at the maxima account for 44 and 47% of the barrier height, respectively. The shapes of these traces are very different. The  $E_e$  trace climbs nearly exponentially from the minimum to the maximum and then drops off in a similar fashion. The  $E_{vdW}$  trace is non-monotonic as there is a slight kink in the profile occurring at 30 and 210°. The same kink is found in the overall trace. The  $E_m$  contribution has a nearly sinusoidal trace with a maximum that is displaced by -20° from the overall maxima. The abrupt decrease in energy after the maxima and the kink in the profile just described may be the outcome of hysteresis, *i.e.* the profile may not represent the lowest energy pathway to rotation. Indeed, if the profile is obtained by rotation in the opposite direction the maxima shift to 70 and 250° with barrier heights of about 20 kcal/mol, as described in the computational method section. However molecular dynamics runs at the minimum and

maximum of this profile did not locate a lower energy structure than was found from the dihedral drive as shown.

A similar analysis of **M-1B** reveals a barrier that is 65%  $E_{\text{vdw}}$  and 21%  $E_{\text{e}}$ . Thus, the **M-1B** has a larger steric contribution for the barrier and a smaller electrostatic contribution compared to **M-1A**. The similar magnitudes of these energy terms for **M-1A** thus results from a relatively low steric contribution and a slightly larger electrostatic contribution illuminated by comparison to the case of **M-1B**. Although the steric contribution dominates the profile in this case, the electrostatic contribution is still larger than the mechanical one. All the traces, but that of  $E_{\text{m}}$  are essentially sinusoidal, and the maximum of  $E_{\text{e}}$  is displaced by  $10^\circ$  with respect to the overall maximum.

**SI 3.** Frequency ( $\nu$ ) of data points versus deviation ( $\text{\AA}$ ) of the calculated equilibrium structure at  $0^\circ$  dihedral angle from the X-ray structure for **M-1A** (blue) and **M-1B** (red). The frequency data is collected in data ranges of  $0.1 \text{ \AA}$ .

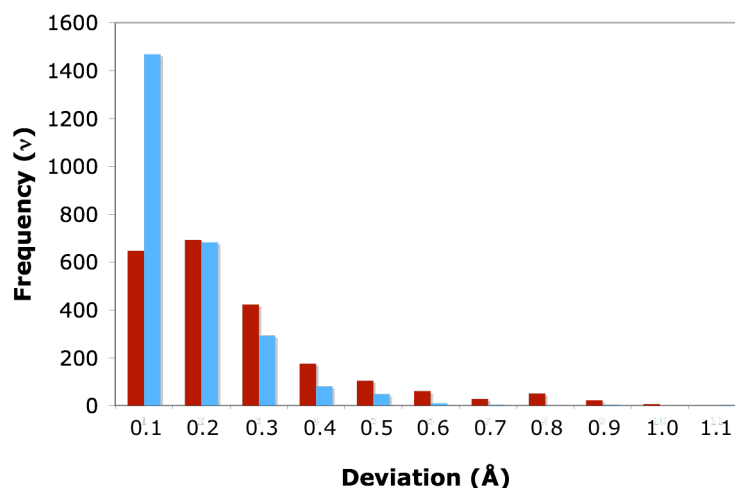

**SI 4.** Deviation ( $\text{\AA}$ ) from calculated  $0^\circ$  equilibrium structure at  $360^\circ$  dihedral angle versus distance ( $\text{\AA}$ ) from the center-of-mass of the models **M-1A** (blue squares) and **M-1B** (red circles).

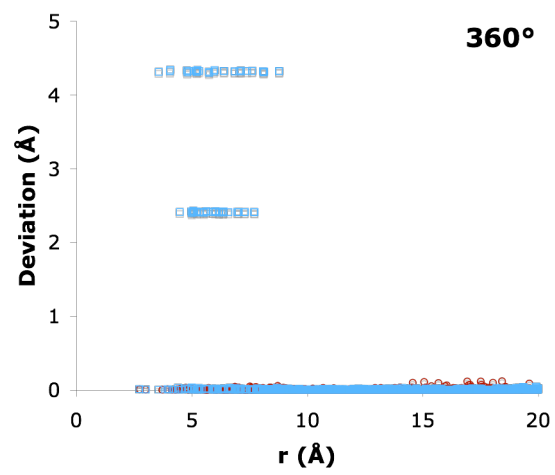

Supplement: Supplementary file 1 [file 4718779]
